# Supplementary material for: Selective capture of volatile iodine using amorphous molecular organic solids
Source: Royal Society of Chemistry journal article supplement (doi:10.1039/c2cc17716a), 2012-01-01
Supplement: c2cc17716a.pdf [file c2cc17716a.pdf]

# Selective Capture of Volatile Iodine using Amorphous Molecular Organic Solid

Pin-Shen Huang, Chih-Hong Kuo, Chang-Chih Hsieh, and Yih-Chern Horng\*

Department of Chemistry, National Changhua University of Education, 1 Jin-De Road, Changhua 50058, Taiwan

## Electronic Supporting Information

### Materials and Methods

#### General Information

Solution  $^1\text{H}$  NMR spectra were collected on a Bruker Avance 300 spectrometer. Infrared spectra were recorded on a Bio-Rad FTS-185 instrument using KBr discs. The crystals suitable for structure analysis were mounted on a glass fiber with silicone grease and placed in the cold stream of a Bruker APEX II diffractometer with graphite monochromated Mo  $K\alpha$  radiation ( $\lambda = 0.71073\text{Å}$ ). The structure was solved by direct methods using SHELXS-97 and refined by full-matrix least squares methods against  $F^2$  with SHELXL-97.<sup>1</sup> Tables of neutral atom scattering factors,  $f'$  and  $f''$ , and absorption coefficients are from a standard source.<sup>2</sup> All atoms except hydrogen atoms were refined with anisotropic displacement parameters. In general, hydrogen atoms were fixed at calculated positions, and their positions were refined by a riding model. The crystal structure of **I<sub>2</sub>·1** contains heavily disordered solvent molecules in the cavity and void spaces. These disordered solvent molecules were not further identified or refined. Instead, a new set of  $F^2$  (hkl) values with the contribution from solvent molecules withdrawn was obtained by the SQUEEZE procedure implemented in PLATON program.<sup>3</sup> Thermogravimetric analysis (TGA) was performed on a Perkin-Elmer Pyris 6 Thermogravimetric Analyzer under flowing  $\text{N}_2$  gas (40 mL/min), and the heating rate was  $5^\circ\text{C}/\text{min}$  from 35 to  $900^\circ\text{C}$ . Powder X-ray diffraction (PXRD) measurements were recorded on Shimadzu Lab-X XRD-6000 diffractometer with Cu  $K\alpha$ ,  $\lambda = 1.54060\text{Å}$ . All PXRD spectra were acquired in a  $2\theta$  range from  $5$  to  $90^\circ$  with a step size of  $0.0200^\circ$ . Elemental analyses were performed on a Heraeus CHN-OS Rapid Elemental Analyzer at the Instruments Center of National Chung Hsing University, Taiwan. Transmission electron microscopy (TEM) and corresponding selected area electron diffraction (SAED) were performed on a JEM-2010 transmission electron microscopy operating at 80-200 KV (JEOL Japan, Co. Ltd). Carbon coated copper grid was used for the sample substrate. A few 8  $\mu\text{l}$  drops of benzene solution of **1** were pipetted onto the sample grid and allowed to dry in air at the ambient temperature. All samples of  $\text{I}_{2(\text{g})}$ -treated amorphous powders of **1** were vacuum-dried at  $110^\circ\text{C}$  for 1 day to remove any non-specific bonding, before the measurements of solid-state IR, TGA, and EA.

**Synthesis of I<sub>2</sub>·1:** A solution of cage **1** (100 mg, 0.088 mmol) in toluene (15 ml) was layered with iodine (22 mg, 0.088 mmol) solution in diethyl ether (5 ml), and then kept at  $-20^\circ\text{C}$  for 1 week. The reddish crystals (99 mg, 81 %) of **I<sub>2</sub>·1** obtained were suitable for X-ray crystallographic analysis. Anal. Calcd for  $\text{C}_{66}\text{H}_{72}\text{I}_2\text{N}_6\text{S}_6$ : C, 56.803; H, 5.200; N, 6.022; S, 13.786. Found: C, 56.885; H, 5.237; N, 6.050; S, 13.792. Crystal data: for **I<sub>2</sub>·1**:  $\text{C}_{66}\text{H}_{72}\text{I}_2\text{N}_6\text{S}_6$ ,  $M = 1395.46$ , trigonal,  $a = 17.583(3)\text{Å}$ ,  $b = 17.583(3)\text{Å}$ ,  $c = 48.345(10)\text{Å}$ ,  $\alpha = 90.00^\circ$ ,  $\beta = 90.00^\circ$ ,  $\gamma = 120.00^\circ$ ,  $V = 12943(4)\text{Å}^3$ ,  $T = 200(2)\text{K}$ , space group  $R\bar{3}c$ ,  $Z = 6$ ,  $\mu(\text{MoK}\alpha) = 0.907\text{mm}^{-1}$ , 25380 reflections measured, 2548 independent reflections ( $R_{\text{int}} = 0.1459$ ). The final  $R_1$  values were 0.0924 ( $I > 2\sigma(I)$ ). The final  $wR(F^2)$  values were 0.2989 ( $I > 2\sigma(I)$ ). The final  $R_1$  values were 0.1417 (all data). The final  $wR(F^2)$  values were 0.3261 (all data). The goodness of fit on  $F^2$  was 1.015. CCDC 848479.

### The studies of I<sub>2</sub> absorption and desorption kinetics

A vial containing powders of **1** (100 mg, 0.088 mmol) was placed with some crystals of iodine in a closed system at 60°C. The total weight of the powders was monitored day by day. After 12 days absorption, the vial was exposed to air and placed in an oven at 120°C. The molar equivalents of I<sub>2</sub> were calculated based on the increased weights measured.

### Supplementary Table and Figures

**Table 1.** The comparison of **1**-related structures reported.

| Compounds               | Bond distance of S-S bond (Å) | CSSC torsion angle (°) | Distance between two centroids of aromatic bases (Å) | Reference          |
|-------------------------|-------------------------------|------------------------|------------------------------------------------------|--------------------|
| DCM <b>1</b>            | 2.065(2)                      | 96.8(2)                | 8.976                                                | (7) in the article |
| DMF <b>1</b>            | 2.049(3)                      | 96.4(2)                | 9.047                                                |                    |
| I <sub>2</sub> <b>1</b> | 2.028(6)                      | 97.0(5)                | 9.058                                                | This work          |

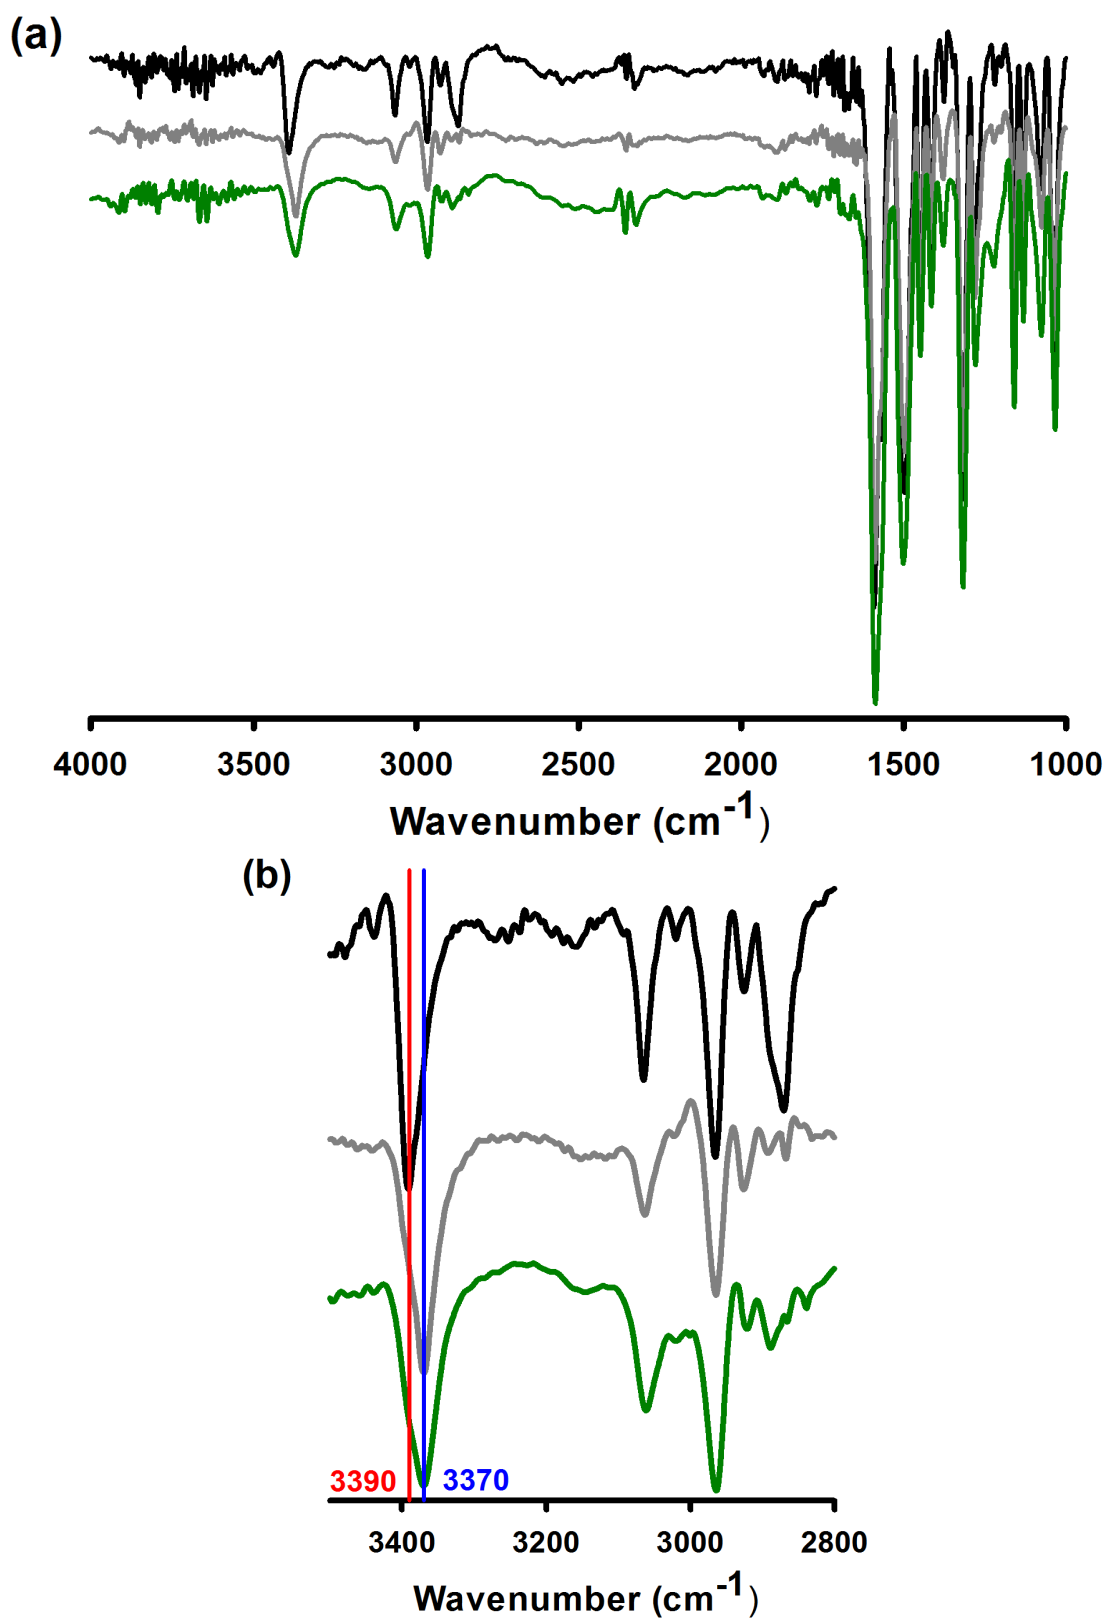

**Fig. 1** (a) Solid-state IR spectra of **1** as synthesized (black line), crystalline  $\text{I}_2 \cdot \mathbf{1}$  (gray line), and **1** after  $\text{I}_{2(g)}$  absorption for 3 days (green line). (b) The same spectra as described above, but only the 2800-3500  $\text{cm}^{-1}$  region shown.

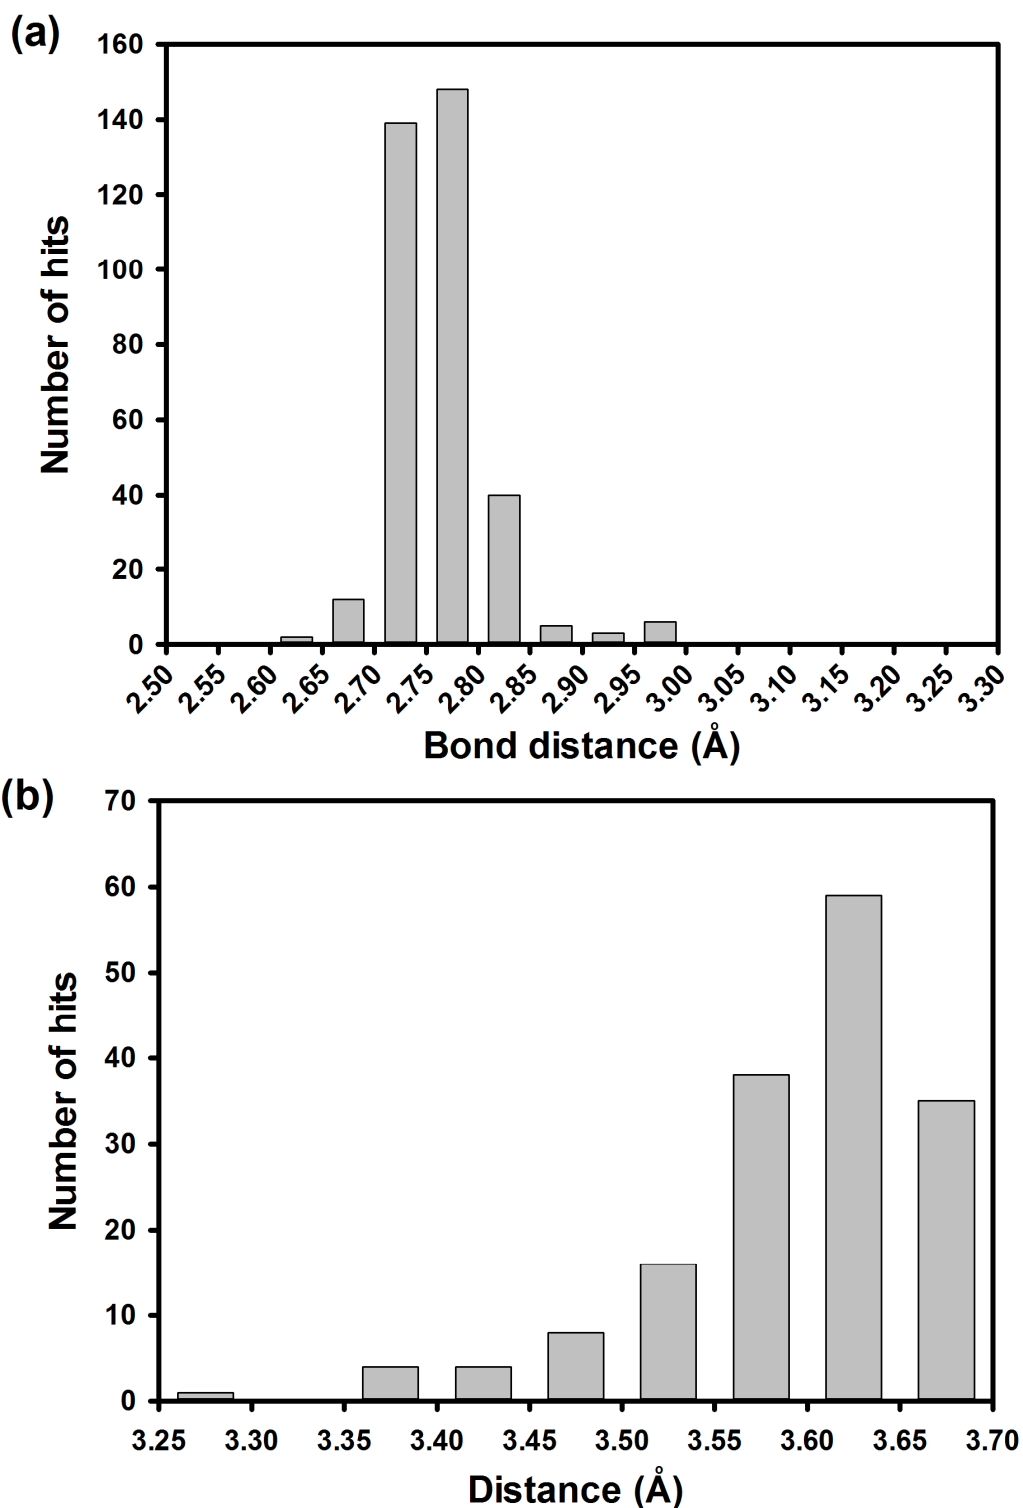

**Fig. 2 (a) I-I bond distance histogram.** A total of 355 hits with shortest one of 2.633 Å were found from a CSD survey for I-I bond distance (2.5-3.3 Å) using Mogul version 1.3. **(b) I...X (X = centroid of Ph) distance histogram.** The CSD search using ConQuest version 1.13 ( $I\cdots X = 2.00\text{-}3.68$  Å, the van der Waals radii: C 1.70 Å; I 1.98 Å) gave 141 entries with 165 hits (the minimum distance = 3.272 Å). No hits were found from 2.00 to 3.25 Å. There are only one hit for I-I...X ( $I\cdots X = 3.553$  Å).

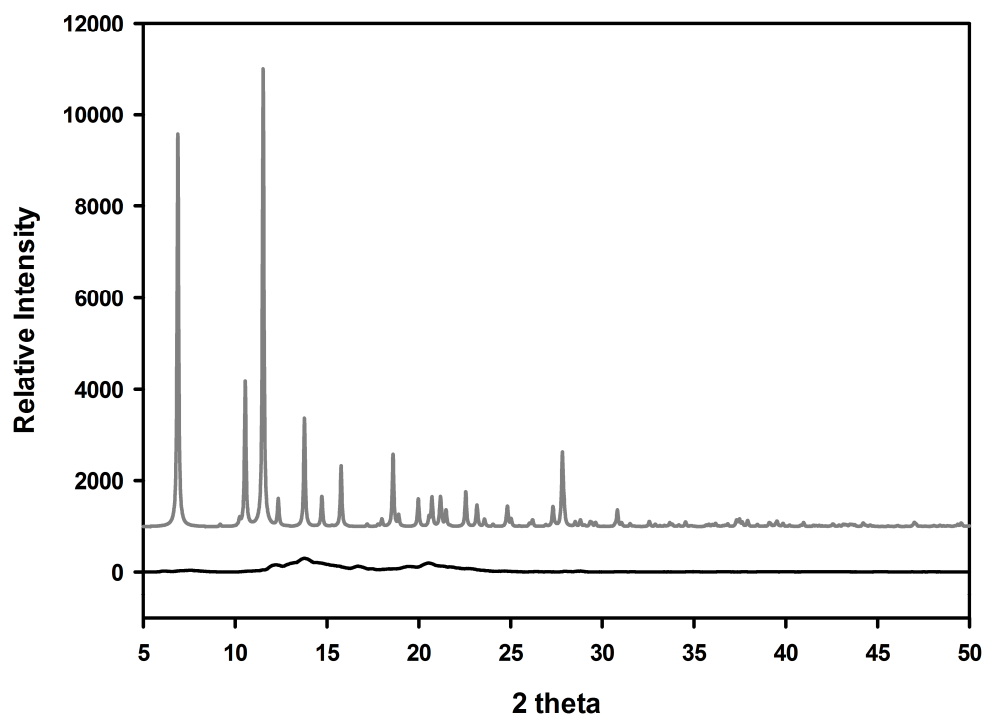

**Fig. 3** PXRD profiles of DMF·1 (gray line) and the powders of 1 as synthesized (black line) indicating the amorphism of 1.

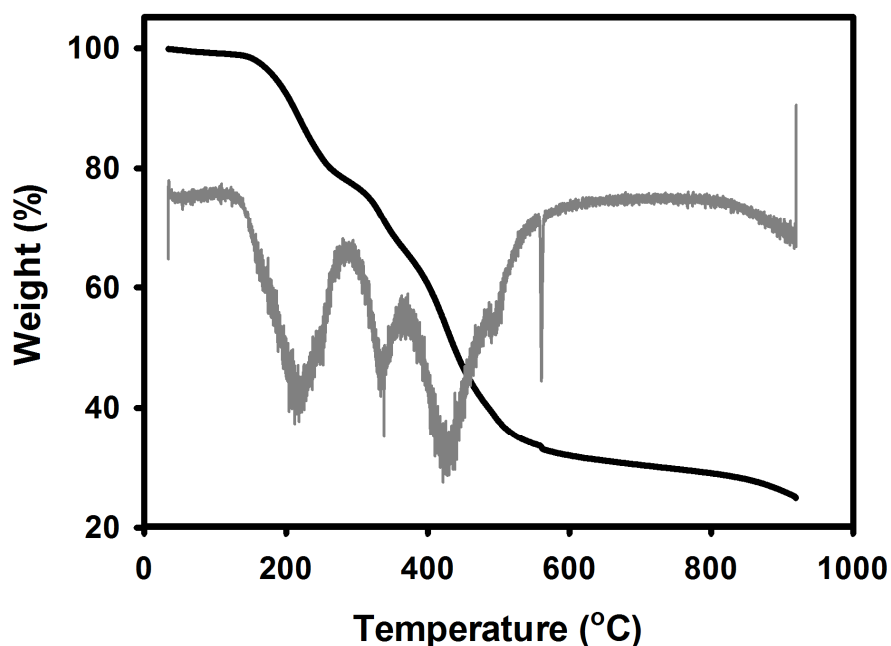

**Fig. 4** Thermogravimetric analysis (black line) and corresponding derivative curves (gray line) for the I<sub>2</sub>-treated powders of 1 demonstrating a multiple-step process, with the first step related to the loss of iodine in temperature range 140~270°C. The observed I<sub>2</sub> mass loss was 19.6% and the calculated I<sub>2</sub> mass loss was 18.5% for one I<sub>2</sub> per molecule I<sub>2</sub>·1. Chemical degradation of 1 started at a temperature above 300°C. The analysis curve is nearly identical to the one for crystalline I<sub>2</sub>·1.

## Reference

1. G. M. Sheldrick, *SHELXTL, Version 5.1*. Bruker AXS Inc., Madison, WI, 1998.
2. L. E. Sutton, *Tables of Interatomic Distances and Configurations in Molecules and Ions*, Chemical Society Publications, UK, 1965.
3. P. van der Sluis, A. L. Spek, *Acta Cryst.* 1990, **A46**, 194-201.
